# Supplementary material
Source: ML conference proceedings conference paper supplement (https://proceedings.neurips.cc/paper_files/paper/2012/hash/3df1d4b96d8976ff5986393e8767f5b2-Abstract.html)
Supplement: Supplementary file 1 [file 3df1d4b96d8976ff5986393e8767f5b2-Supplemental.zip]

---

# Supplementary Material for *Efficient Monte Carlo Counterfactual Regret Minimization in Games with Many Player Actions*

---

**Richard Gibson, Neil Burch, Marc Lanctot, and Duane Szafron**

Department of Computing Science, University of Alberta

Edmonton, Alberta, T6G 2E8, Canada

{rggibson | nburch | lanctot | dszafron}@ualberta.ca

## 1 Introduction

This supplementary material proves Theorems 4, 5, and 6 from the paper *Efficient Monte Carlo Counterfactual Regret Minimization in Games with Many Player Actions* and proves that Average Strategy Sampling (AS) exhibits the same regret bound given by Theorem 6.

## 2 Preliminaries

We begin by providing additional notation and definitions. For a history  $h' \in H$ , we say that the history  $h$  is a **prefix** of  $h'$ , written  $h \sqsubseteq h'$ , if  $h'$  begins with the sequence  $h$ . For a history  $h \in H_i$  and a strategy profile  $\sigma \in \Sigma$ , let  $I(h)$  be the information set containing  $h$  and denote  $\sigma(h, \cdot) = \sigma(I(h), \cdot)$ . Similar to the definition of  $\pi^\sigma(h, h')$ , let  $\pi_i^\sigma(h, h')$  and  $\pi_{-i}^\sigma(h, h')$  be the probability contributed from player  $i$  and from all players/chance other than  $i$  respectively of history  $h'$  occurring after history  $h$ , given that history  $h$  has occurred. Furthermore, for  $I \in \mathcal{I}_i$ , define  $\pi_{-i}^\sigma(I) = \sum_{h \in I} \pi_{-i}^\sigma(h)$ .

Define the **counterfactual value for player  $i$  at  $h$  under  $\sigma$**  to be

$$v_i(h, \sigma) = \sum_{\substack{z \in Z \\ h \sqsubseteq z}} \pi_{-i}^\sigma(h) \pi^\sigma(h, z) u_i(z).$$

Notice that for  $I \in \mathcal{I}_i$ , perfect recall implies that

$$v_i(I, \sigma) = \sum_{h \in I} v_i(h, \sigma). \tag{1}$$

In addition, for  $h \in H_i$  and a strategy  $\sigma'_i \in \Sigma_i$ , define

$$R_i^T(h, \sigma'_i) = \sum_{t=1}^T (v_i(h, \sigma_{(I(h) \rightarrow \sigma'_i)}^t) - v_i(h, \sigma_i^t))$$

to be the **counterfactual regret at  $h$  for  $\sigma'_i$** , where  $\sigma_{(I \rightarrow \sigma'_i)}$  is the strategy profile  $\sigma$  except at  $I$ , we follow  $\sigma'_i$ . Note that by (1),

$$R_i^T(I, \sigma'_i) = \sum_{h \in I} R_i^T(h, \sigma'_i). \tag{2}$$

Furthermore, define the **full counterfactual regret at  $h$  for  $\sigma'_i$**  to be

$$R_{i,\text{full}}^T(h, \sigma'_i) = \sum_{t=1}^T (v_i(h, (\sigma'_i, \sigma_{-i}^t)) - v_i(h, \sigma^t)).$$

The full counterfactual regret measures how much we wish we had played  $\sigma'_i$  at every history from  $h$  on, rather than playing  $\sigma^t$  at every time step. Notice that the regret  $R_i^T = \max_{\sigma'_i \in \Sigma_i} R_{i,\text{full}}^T(\emptyset, \sigma'_i)$ , where  $\emptyset$  is the root of the game.

We now need some notation regarding reachable histories. Firstly, define  $H_i = \{h \in H \mid P(h) = i\}$  to be the set of all histories belonging to player  $i$ . Next, for  $h \in H_i$ , define

$$\text{Succ}^1(h) = \{h' \in H_i \mid h \sqsubset h' \text{ and } \nexists h'' \in H_i \text{ such that } h \sqsubset h'' \sqsubset h'\}$$

to be the set of all possible next histories for player  $i$  before taking another action. For an integer  $\ell > 1$ , we recursively define

$$\text{Succ}^\ell(h) = \bigcup_{h' \in \text{Succ}^{\ell-1}(h)} \text{Succ}^1(h')$$

to be the set of all possible histories of player  $i$  reachable after exactly  $\ell$  more actions by player  $i$ . Similarly, let

$$Z^1(h) = \{z \in Z \mid h \sqsubset z \text{ and } \nexists h' \in H_i \text{ such that } h \sqsubset h' \sqsubset z\}$$

be the set of all terminal histories where player  $i$ 's last action was at  $h$ . Finally, define

$$D(h) = \{h\} \cup \bigcup_{\ell \geq 1} \text{Succ}^\ell(h)$$

to be the set of all nonterminal histories for player  $i$  descending from  $h$ .

### 3 Proof of Theorems 4, 5, and 6

**Lemma A.** For  $h \in H_i$  and  $\sigma'_i \in \Sigma_i$ ,

$$R_{i,\text{full}}^T(h, \sigma'_i) = \sum_{h' \in D(h)} \pi_{i'}^{\sigma'}(h, h') R_i^T(h', \sigma'_i).$$

**Proof.** The proof is by strong induction on  $|D(h)|$ . Note that the base case  $D(h) = \{h\}$  is trivial since  $R_{i,\text{full}}^T(h, \sigma'_i) = R_i^T(h, \sigma'_i)$ . For the induction step, assume that the lemma holds for all  $h' \in H_i$  with  $|D(h')| < |D(h)|$ . To complete the proof, we must show that the lemma holds for  $h$ . To start,

$$\begin{aligned} R_{i,\text{full}}^T(h, \sigma'_i) &= \sum_{t=1}^T v_i(h, (\sigma'_i, \sigma_{-i}^t)) - \sum_{t=1}^T v_i(h, \sigma^t) \\ &= \sum_{t=1}^T \sum_{a \in A(h)} \sigma'_i(h, a) v_i(h, (\sigma'_{i(I(h) \rightarrow a)}, \sigma_{-i}^t)) - \sum_{t=1}^T v_i(h, \sigma^t) \\ &= \sum_{a \in A(h)} \sigma'_i(h, a) \sum_{t=1}^T \left( \sum_{\substack{z \in Z^1(h) \\ ha \sqsubseteq z}} \pi_{-i}^{\sigma^t}(z) u_i(z) \right. \\ &\quad \left. + \sum_{\substack{h' \in \text{Succ}^1(h) \\ ha \sqsubseteq h'}} v_i(h', (\sigma'_i, \sigma_{-i}^t)) \right) - \sum_{t=1}^T v_i(h, \sigma^t). \end{aligned} \tag{3}$$

Now, notice that for all  $h' \in \text{Succ}^1(h)$ ,  $D(h') \subset D(h)$  and  $h \notin D(h')$ , and so  $|D(h')| < |D(h)|$  for all  $h' \in \text{Succ}^1(h)$ . Therefore, we may apply the induction hypothesis to each  $h' \in \text{Succ}^1(h)$ , giving us

$$\sum_{t=1}^T v_i(h', (\sigma'_i, \sigma_{-i}^t)) = R_{i,\text{full}}^T(h', \sigma'_i) + \sum_{t=1}^T v_i(h', \sigma^t)$$

$$= \sum_{h'' \in D(h')} \pi_i^{\sigma'}(h', h'') R_i^T(h'', \sigma'_i) + \sum_{t=1}^T v_i(h', \sigma^t)$$

for all  $h' \in \text{Succ}^1(h)$ . Substituting this into (3), after changing the order of summation, gives

$$\begin{aligned} R_{i,\text{full}}^T(h, \sigma'_i) &= \sum_{a \in A(h)} \sigma'_i(h, a) \left[ \sum_{t=1}^T \sum_{\substack{z \in Z^1(h) \\ ha \sqsubseteq z}} \pi_{-i}^{\sigma^t}(z) u_i(z) \right. \\ &\quad + \sum_{\substack{h' \in \text{Succ}^1(h) \\ ha \sqsubseteq h'}} \left( \sum_{h'' \in D(h')} \pi_i^{\sigma'}(h', h'') R_i^T(h'', \sigma'_i) + \sum_{t=1}^T v_i(h', \sigma^t) \right) \left. \right] \\ &\quad - \sum_{t=1}^T v_i(h, \sigma^t) \\ &= \sum_{a \in A(h)} \sigma'_i(h, a) \sum_{t=1}^T v_i(h, \sigma_{(I(h) \rightarrow a)}^t) - \sum_{t=1}^T v_i(h, \sigma^t) \\ &\quad + \sum_{a \in A(h)} \sigma'_i(h, a) \sum_{\substack{h' \in \text{Succ}^1(h) \\ ha \sqsubseteq h'}} \sum_{h'' \in D(h')} \pi_i^{\sigma'}(h', h'') R_i^T(h'', \sigma'_i) \\ &= \sum_{a \in A(h)} \sigma'_i(h, a) R_i^T(h, a) + \sum_{\substack{h' \in D(h) \\ h' \neq h}} \pi_i^{\sigma'}(h, h') R_i^T(h', \sigma'_i) \\ &= \sum_{h' \in D(h)} \pi_i^{\sigma'}(h, h') R_i^T(h', \sigma'_i), \end{aligned}$$

completing the proof. ■

**Theorem 4.**

$$R_i^T = \sum_{I \in \mathcal{I}_i} \pi_i^{\sigma^*}(I) R_i^T(I, \sigma_i^*).$$

**Proof.** We may assume that player  $i$  acts at the root of the game,  $\emptyset$ ; otherwise, we may append a new root to the game that belongs to player  $i$ , is contained in a new, singleton information set, and has one action leading to the old root. Then,

$$\begin{aligned} R_i^T &= \max_{\sigma'_i \in \Sigma_i} \sum_{t=1}^T (u_i(\sigma'_i, \sigma_{-i}^t) - u_i(\sigma_i^t, \sigma_{-i}^t)) \\ &= R_{i,\text{full}}^T(\emptyset, \sigma_i^*) \\ &= \sum_{h \in H_i \setminus Z} \pi_i^{\sigma^*}(h) R_i^T(h, \sigma_i^*) \text{ by Lemma A} \\ &= \sum_{I \in \mathcal{I}_i} \sum_{h \in I} \pi_i^{\sigma^*}(h) R_i^T(h, \sigma_i^*) \\ &= \sum_{I \in \mathcal{I}_i} \pi_i^{\sigma^*}(I) \sum_{h \in I} R_i^T(h, \sigma_i^*) \text{ due to perfect recall} \\ &= \sum_{I \in \mathcal{I}_i} \pi_i^{\sigma^*}(I) R_i^T(I, \sigma_i^*), \end{aligned}$$

where the last line follows by equation (2). ■

**Theorem 5.** When using vanilla CFR, average regret is bounded by

$$\frac{R_i^T}{T} \leq \frac{\Delta_i M_i(\sigma_i^*) \sqrt{|A_i|}}{\sqrt{T}}.$$

**Proof.** Following the proof of Theorem 2 [10],

$$\begin{aligned}
R_i^T &= \sum_{I \in \mathcal{I}_i} \pi_i^{\sigma^*}(I) R_i^T(I, \sigma_i^*) \text{ by Theorem 4} \\
&= \sum_{I \in \mathcal{I}_i} \pi_i^{\sigma^*}(I) \sum_{a \in A(I)} \sigma_i^*(I, a) R_i^T(I, a) \\
&= \sum_{I \in \mathcal{I}_i} \pi_i^{\sigma^*}(I) \max_{a \in A(I)} R_i^T(I, a) \\
&\leq \sum_{I \in \mathcal{I}_i} \pi_i^{\sigma^*}(I) \sqrt{\sum_{a \in A(I)} T^2 (R_i^{T,+}(I, a)/T)^2} \\
&\leq \sum_{I \in \mathcal{I}_i} \pi_i^{\sigma^*}(I) \Delta_i \sqrt{|A(I)|} \sqrt{\sum_{t=1}^T (\pi_{-i}^{\sigma^t}(I))^2} \\
&\text{by Theorem 6 of [10] with } \Delta_t = \Delta_i \pi_{-i}^{\sigma^t}(I) \\
&\leq \Delta_i \sqrt{|A_i|} \sum_{B \in \mathcal{B}_i} \pi_i^{\sigma^*}(B) \sum_{I \in B} \sqrt{\sum_{t=1}^T (\pi_{-i}^{\sigma^t}(I))^2} \\
&\leq \Delta_i \sqrt{|A_i|} \sum_{B \in \mathcal{B}_i} \pi_i^{\sigma^*}(B) \sqrt{|B| \sum_{t=1}^T \sum_{I \in B} \pi_{-i}^{\sigma^t}(I)} \\
&\text{by Lemma 6 of [10]} \\
&\leq \Delta_i \sqrt{|A_i|} \sum_{B \in \mathcal{B}_i} \pi_i^{\sigma^*}(B) \sqrt{|B|T} \text{ by Lemma 16 of [10]} \\
&= \Delta_i \sqrt{|A_i|T} M_i(\sigma_i^*).
\end{aligned}$$

Dividing both sides by  $T$  gives the result. ■

We now prove a general, probabilistic bound that can be applied to any MCCFR sampling algorithm. We then use this bound to prove Theorem 6 and a similar bound for AS.

**Lemma B.** *Let  $p, \delta \in (0, 1]$ . When using any MCCFR algorithm, if*

$$\sum_{I \in B} \left( \sum_{z \in Q \cap Z_I} \frac{\pi^{\sigma^t}(z[I], z) \pi_{-i}^{\sigma^t}(z[I])}{q(z)} \right)^2 \leq \frac{1}{\delta^2}$$

*for all  $Q \in \mathcal{Q}$ ,  $B \in \mathcal{B}_i$ , and  $t \leq T$ , then with probability at least  $1 - p$ , average regret is bounded by*

$$\frac{R_i^T}{T} \leq \left( M_i(\sigma_i^*) + \frac{\sqrt{2|\mathcal{I}_i||\mathcal{B}_i|}}{\sqrt{p}} \right) \left( \frac{1}{\delta} \right) \frac{\Delta_i \sqrt{|A_i|}}{\sqrt{T}}.$$

**Proof.** Our proof follows that of Theorem 7 in [10]. To start, define

$$\Delta_i^t(I) = \Delta_i \sum_{z \in Q \cap Z_I} \frac{\pi^{\sigma^t}(z[I], z) \pi_{-i}^{\sigma^t}(z[I])}{q(z)}$$

so that the difference between two sampled counterfactual values at information set  $I$  is bounded by

$$\tilde{v}_i(I, \sigma_{(I \rightarrow a)}^t) - \tilde{v}_i(I, \sigma_{(I \rightarrow b)}^t) \leq \Delta_i^t(I)$$

for all  $a, b \in A(I)$ . By our assumption, we then have

$$\sum_{I \in B} (\Delta_i^t(I))^2 \leq \frac{(\Delta_i)^2}{\delta^2} \tag{4}$$

for all  $B \in \mathcal{B}_i$ .

Define  $R_i^T(I) = \max_{a \in A(I)} R_i^T(I, a)$  and  $\tilde{R}_i^T(I) = \max_{a \in A(I)} \tilde{R}_i^T(I, a)$ . The proof will proceed as follows. First, we prove a bound on the weighted sum of the cumulative sampled counterfactual regrets  $\sum_{I \in \mathcal{I}} \pi_i^{\sigma^*}(I) \tilde{R}_i^T(I)$ . Secondly, we prove a probabilistic bound on the expected squared difference between  $\sum_{I \in \mathcal{I}_i} \pi_i^{\sigma^*}(I) R_i^T(I)$  and  $\sum_{I \in \mathcal{I}} \pi_i^{\sigma^*}(I) \tilde{R}_i^T(I)$ , showing that the true counterfactual regrets are not too far from the sampled counterfactual regrets. Finally, we apply Theorem 4 to obtain the bound on the average regret.

For the first step,

$$\begin{aligned}
\sum_{I \in \mathcal{I}_i} \pi_i^{\sigma^*}(I) \tilde{R}_i^T(I) &\leq \sum_{I \in \mathcal{I}_i} \pi_i^{\sigma^*}(I) \sqrt{T^2 \sum_{a \in A(I)} \left( \frac{\tilde{R}_i^{T,+}(I, a)}{T} \right)^2} \\
&\leq \sum_{I \in \mathcal{I}_i} \pi_i^{\sigma^*}(I) \sqrt{|A(I)| \sum_{t=1}^T (\Delta_i^t(I))^2} \\
&\quad \text{by Theorem 6 of [10]} \\
&\leq \sqrt{|A_i|} \sum_{B \in \mathcal{B}_i} \pi_i^{\sigma^*}(B) \sum_{I \in B} \sqrt{\sum_{t=1}^T (\Delta_i^t(I))^2} \\
&\leq \sqrt{|A_i|} \sum_{B \in \mathcal{B}_i} \pi_i^{\sigma^*}(B) \sqrt{|B| \sum_{t=1}^T \sum_{I \in B} (\Delta_i^t(I))^2} \\
&\quad \text{by Lemma 5 of [10]} \\
&\leq \sqrt{|A_i|} \sum_{B \in \mathcal{B}_i} \pi_i^{\sigma^*}(B) \sqrt{|B| T \frac{(\Delta_i)^2}{\delta^2}} \text{ by equation (4)} \\
&= \frac{\Delta_i M_i(\sigma_i^*) \sqrt{|A_i| T}}{\delta}. \tag{5}
\end{aligned}$$

Secondly, for  $I \in \mathcal{I}_i$ ,

$$\begin{aligned}
\left( R_i^T(I) - \tilde{R}_i^T(I) \right)^2 &= \left( \max_{a \in A(I)} \sum_{t=1}^T r_i^t(I, a) - \max_{a \in A(I)} \sum_{t=1}^T \tilde{r}_i^t(I, a) \right)^2 \\
&\leq \left( \max_{a \in A(I)} \sum_{t=1}^T (r_i^t(I, a) - \tilde{r}_i^t(I, a)) \right)^2 \\
&\leq \max_{a \in A(I)} \left( \sum_{t=1}^T (r_i^t(I, a) - \tilde{r}_i^t(I, a)) \right)^2 \\
&\leq \sum_{a \in A(I)} \left[ \sum_{t=1}^T (r_i^t(I, a) - \tilde{r}_i^t(I, a))^2 \right. \\
&\quad \left. + 2 \sum_{t=1}^T \sum_{t'=t+1}^T (r_i^t(I, a) - \tilde{r}_i^t(I, a)) (r_i^{t'}(I, a) - \tilde{r}_i^{t'}(I, a)) \right]. \tag{6}
\end{aligned}$$

We now multiply both sides by  $(\pi_i^{\sigma^*}(I))^2$  and take the expectation of both sides. Note that

$$\begin{aligned}
&\mathbf{E} \left[ (r_i^t(I, a) - \tilde{r}_i^t(I, a)) (r_i^{t'}(I, a) - \tilde{r}_i^{t'}(I, a)) \right] \\
&= \mathbf{E} \left[ \mathbf{E} \left[ (r_i^{t'}(I, a) - \tilde{r}_i^{t'}(I, a)) \mid r_i^t(I, a), \tilde{r}_i^t(I, a) \right] (r_i^t(I, a) - \tilde{r}_i^t(I, a)) \right]
\end{aligned}$$

and that  $\mathbf{E} \left[ (r_i^{t'}(I, a) - \tilde{r}_i^{t'}(I, a)) \mid r_i^t(I, a), \tilde{r}_i^t(I, a) \right] = 0$  since for  $t' > t$ ,  $\tilde{r}_i^{t'}$  is an unbiased estimate of  $r_i^{t'}$  given  $\sigma^{t'}$ . Thus from equation (6), we have

$$\begin{aligned} \mathbf{E} \left[ (\pi_i^{\sigma^*}(I))^2 \left( R_i^T(I) - \tilde{R}_i^T(I) \right)^2 \right] &\leq \sum_{a \in A(I)} \sum_{t=1}^T \mathbf{E} \left[ (\pi_i^{\sigma^*}(I))^2 \left( r_i^t(I, a) - \tilde{r}_i^t(I, a) \right)^2 \right] \\ &\leq \sum_{a \in A(I)} \sum_{t=1}^T \mathbf{E} \left[ (r_i^t(I, a))^2 + (\tilde{r}_i^t(I, a))^2 \right] \\ &\leq \sum_{a \in A(I)} \sum_{t=1}^T \left[ \left( \pi_{-i}^{\sigma^t}(I) \right)^2 \Delta_i^2 + (\Delta_i^t(I))^2 \right]. \end{aligned} \quad (7)$$

We can now bound the expected squared difference between  $\sum_{I \in \mathcal{I}_i} \pi_i^{\sigma^*}(I) R_i^T(I)$  and  $\sum_{I \in \mathcal{I}_i} \pi_i^{\sigma^*}(I) \tilde{R}_i^T(I)$  by

$$\begin{aligned} \mathbf{E} \left[ \left( \sum_{I \in \mathcal{I}_i} \pi_i^{\sigma^*}(I) \left( R_i^T(I) - \tilde{R}_i^T(I) \right) \right)^2 \right] &\leq \mathbf{E} \left[ \left( \sum_{I \in \mathcal{I}_i} \left| \pi_i^{\sigma^*}(I) \left( R_i^T(I) - \tilde{R}_i^T(I) \right) \right| \right)^2 \right] \\ &\leq \mathbf{E} \left[ \left( \sqrt{|\mathcal{I}_i| \sum_{I \in \mathcal{I}_i} \left| \pi_i^{\sigma^*}(I) \left( R_i^T(I) - \tilde{R}_i^T(I) \right) \right|^2} \right)^2 \right] \\ &\quad \text{by Lemma 5 of [10]} \\ &= |\mathcal{I}_i| \sum_{I \in \mathcal{I}_i} \mathbf{E} \left[ \left( \pi_i^{\sigma^*}(I) \right)^2 \left( R_i^T(I) - \tilde{R}_i^T(I) \right)^2 \right] \\ &\leq |\mathcal{I}_i| \sum_{I \in \mathcal{I}_i} \sum_{a \in A(I)} \sum_{t=1}^T \left[ \left( \pi_{-i}^{\sigma^t}(I) \right)^2 \Delta_i^2 + (\Delta_i^t(I))^2 \right] \\ &\quad \text{by equation (7)} \\ &\leq |\mathcal{I}_i| |A_i| \sum_{B \in \mathcal{B}_i} \sum_{t=1}^T \left[ \sum_{I \in B} \left( \pi_{-i}^{\sigma^t}(I) \right)^2 \Delta_i^2 + \sum_{I \in B} (\Delta_i^t(I))^2 \right] \\ &\leq |\mathcal{I}_i| |A_i| \sum_{B \in \mathcal{B}_i} \sum_{t=1}^T \left[ \Delta_i^2 + \frac{\Delta_i^2}{\delta^2} \right] \\ &\quad \text{by Lemma 16 of [10] and equation (4)} \\ &\leq \frac{2|\mathcal{I}_i| |A_i| |\mathcal{B}_i| T \Delta_i^2}{\delta^2} \end{aligned} \quad (8)$$

Finally, with probability  $1 - p$ , we can bound the regret by

$$\begin{aligned} R_i^T &= \sum_{I \in \mathcal{I}_i} \pi_i^{\sigma^*}(I) R_i^T(I) \text{ by Theorem 4} \\ &= \sum_{I \in \mathcal{I}_i} \pi_i^{\sigma^*}(I) \left( R_i^T(I) - \tilde{R}_i^T(I) + \tilde{R}_i^T(I) \right) \\ &\leq \left| \sum_{I \in \mathcal{I}_i} \pi_i^{\sigma^*}(I) \left( R_i^T(I) - \tilde{R}_i^T(I) \right) \right| + \sum_{I \in \mathcal{I}_i} \pi_i^{\sigma^*}(I) \tilde{R}_i^T(I) \end{aligned}$$

$$\begin{aligned}
&\leq \frac{1}{\sqrt{p}} \sqrt{\mathbf{E} \left[ \left( \sum_{I \in \mathcal{I}_i} \pi_i^{\sigma^*}(I) (R_i^T(I) - \tilde{R}_i^T(I)) \right)^2 \right]} + \frac{\Delta_i M_i(\sigma_i^*) \sqrt{|A_i|T}}{\delta} \\
&\quad \text{by Lemma 2 of [10] and equation (5)} \\
&\leq \left( \frac{\sqrt{2|\mathcal{I}_i||\mathcal{B}_i|}}{\sqrt{p}} + M_i(\sigma_i^*) \right) \left( \frac{1}{\delta} \right) \Delta_i \sqrt{|A_i|T}
\end{aligned}$$

by equation (8). Dividing both sides by  $T$  gives the result. ■

**Theorem 6'.** *Let  $X$  be one of CS, ES, OS (assuming OS samples opponent actions according to  $\sigma_{-i}$ ), or AS, let  $p \in (0, 1]$ , and let  $\delta = \min_{z \in \mathcal{Z}} q_i(z) > 0$  over all  $1 \leq t \leq T$ . When using  $X$ , with probability  $1 - p$ , average regret is bounded by*

$$\frac{R_i^T}{T} \leq \left( M_i(\sigma_i^*) + \frac{\sqrt{2|\mathcal{I}_i||\mathcal{B}_i|}}{\sqrt{p}} \right) \left( \frac{1}{\delta} \right) \frac{\Delta_i \sqrt{|A_i|}}{\sqrt{T}}.$$

**Proof.** By Lemma B, it suffices to show that

$$Y = \sum_{I \in B} \left( \sum_{z \in Q \cap Z_I} \frac{\pi^{\sigma^t}(z[I], z) \pi_{-i}^{\sigma^t}(z[I])}{q(z)} \right)^2 \leq \frac{1}{\delta^2}$$

for all  $B \in \mathcal{B}_i$ ,  $Q \in \mathcal{Q}$ , and  $t \leq T$ . To that end, fix  $B \in \mathcal{B}_i$ ,  $Q \in \mathcal{Q}$ , and  $t \leq T$ . Since  $X$  samples a single action at each  $h \in H_c$  according to  $\sigma_c$ , there exists a unique  $a_h^* \in A(h)$  such that if  $z \in Q$  and  $h \sqsubseteq z$ , then  $ha_h^* \sqsubseteq z$ . Consider the new chance probability distribution  $\hat{\sigma}_c$  defined according to

$$\hat{\sigma}_c(h, a) = \begin{cases} 1 & \text{if } a = a_h^* \\ 0 & \text{if } a \neq a_h^* \end{cases}$$

for all  $h \in H_c$ ,  $a \in A(h)$ . When  $X \neq \text{CS}$ , we also have a unique such action  $a_I^*$  for each  $I \in \mathcal{I}_{-i}$  sampled according to  $\sigma_{-i}^t$ , so we can similarly define the new opponent profile  $\hat{\sigma}_{-i}$  according to

$$\hat{\sigma}_{-i}(I, a) = \begin{cases} \sigma_{-i}^t(I, a) & \text{if } X = \text{CS} \\ 1 & \text{if } X \neq \text{CS and } a = a_I^* \\ 0 & \text{if } X \neq \text{CS and } a \neq a_I^* \end{cases}$$

for all  $I \in \mathcal{I}_{-i}$ ,  $a \in A(I)$ . Then

$$\begin{aligned}
Y &= \sum_{I \in B} \left( \sum_{z \in Q \cap Z_I} \frac{\pi_i^{\sigma^t}(z[I], z) \pi_{-i}^{\sigma^t}(z[I])}{q(z)} \right)^2 \\
&= \sum_{I \in B} \left( \sum_{z \in Z_I} \frac{\pi_i^{\sigma^t}(z[I], z) \pi_{-i}^{\hat{\sigma}}(z[I])}{q_i(z)} \right)^2 \\
&\leq \frac{1}{\delta^2} \sum_{I \in B} \left( \sum_{z \in Z_I} \pi_{-i}^{\hat{\sigma}}(z[I]) \right)^2 \\
&= \frac{1}{\delta^2} \sum_{I \in B} (\pi_{-i}^{\hat{\sigma}}(I))^2 \\
&\leq \frac{1}{\delta^2},
\end{aligned}$$

where the last line follows by Lemma 16 of [10]. ■
