# Supplementary material
Source: ML conference proceedings conference paper supplement (https://proceedings.neurips.cc/paper_files/paper/2012/hash/3df1d4b96d8976ff5986393e8767f5b2-Abstract.html)
Supplement: Supplementary file 2 [file 3df1d4b96d8976ff5986393e8767f5b2-Supplemental.zip]

Archive with 1 entries (1 files):
- appendix.pdf
